# Supplementary material for: Determination of Postprandial Glycemic Responses by Continuous Glucose Monitoring in a Real-World Setting
Source: MDPI journal article supplement (doi:10.3390/nu11102305), 2019-09-27
Supplement: s1 [file s1]

**Table S1.** Energy and macronutrient distribution of foods.

|                            | Glucose drink |                | White bread |                 | Whole grain bread |                 |
|----------------------------|---------------|----------------|-------------|-----------------|-------------------|-----------------|
|                            | 100 g         | Portion (67 g) | 100 g       | portion (104 g) | 100 g             | portion (143 g) |
| Energy (kcal)              | 1256          | 837            | 1120        | 1167            | 962               | 1374            |
| Energy (kcal)              | 300           | 200            | 265         | 276             | 229               | 327             |
| Available carbohydrate (g) | 75            | 50             | 48          | 50              | 35                | 50              |
| Sugar (g)                  | 75            | 50             | 4.0         | 4.2             | 2.3               | 3.3             |
| Total fiber (g)            | 0             | 0              | 3.0         | 3.1             | 6.9               | 9.9             |
| Total fat (g)              | 0             | 0              | 3.8         | 4.0             | 4.9               | 7.0             |
| Saturated fatty acids (g)  | 0             | 0              | 2.0         | 2.1             | 0.8               | 1.1             |
| Total protein (g)          | 0             | 0              | 8.2         | 8.5             | 7.7               | 11              |
| Sodium (mg)                | 0             | 0              | 1.1         | 1.1             | 1.2               | 1.7             |

Data are based on nutritional information from every product used per 100 g product as well as per portion consumed.

**Table S2.** Correlation matrix between AUC<sub>i</sub> and selected patient and baseline characteristics.

| Parameter                      | AUC <sub>i</sub> G 0-60 | AUC <sub>i</sub> G 0-120 | AUC <sub>i</sub> WG 0-120               | AUC <sub>i</sub> WG 0-120               |
|--------------------------------|-------------------------|--------------------------|-----------------------------------------|-----------------------------------------|
| Age (yrs)                      | r = 0.629<br>P = 0.029  | r = 0.768<br>P = 0.004   | <b>r = 0.867</b><br><b>P &lt; 0.001</b> | r = 0.758<br>P = 0.004                  |
| BMI (kg/m <sup>2</sup> )       | r = 0.196<br>P = 0.542  | r = 0.364<br>P = 0.245   | r = 0.350<br>P = 0.265                  | r = 0.182<br>P = 0.572                  |
| Fasting blood glucose (mg/dl)  | r = 0.444<br>P = 0.149  | r = 0.620<br>P = 0.032   | <b>r = 0.838</b><br><b>P &lt; 0.001</b> | <b>r = 0.838</b><br><b>P &lt; 0.001</b> |
| HbA1c (%)                      | r = 0.263<br>P = 0.409  | r = 0.418<br>P = 0.177   | r = 0.319<br>P = 0.312                  | r = 0.270<br>P = 0.396                  |
| Fasting plasma insulin (μU/mL) | r = -0.084<br>P = 0.795 | r = 0.042<br>P = 0.897   | r = 0.105<br>P = 0.746                  | r = 0.056<br>P = 0.863                  |

Bold numbers are significant after Bonferroni correction (P < 0.003125). G, glucose; WG, whole grain bread.
